# Supplementary material
Source: PubMed Central journal article supplement (PMC6561298)
Supplement: pnas.1818871116.sapp.pdf [file pnas.1818871116.sapp.pdf]

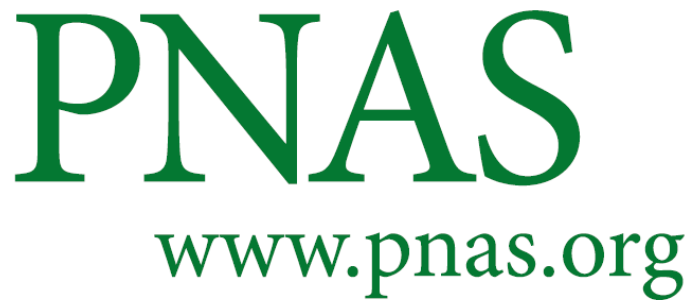

## Supplementary Information for

In vivo evidence for dysregulation of mGluR5 as a biomarker of suicidal ideation in PTSD

Margaret T. Davis, Ansel Hillmer, Sophie E. Holmes, Robert H. Pietrzak, Nicole DellaGioia, Nabeel Nabulsi, David Matuskey, Gustavo Angarita-Africano, Richard E. Carson, John H. Krystal, Irina Esterlis

Corresponding author: Irina Esterlis, Ph.D.

Email: [irina.esterlis@yale.edu](mailto:irina.esterlis@yale.edu)

### **This PDF file includes:**

Figs. S1-S2  
Table S1

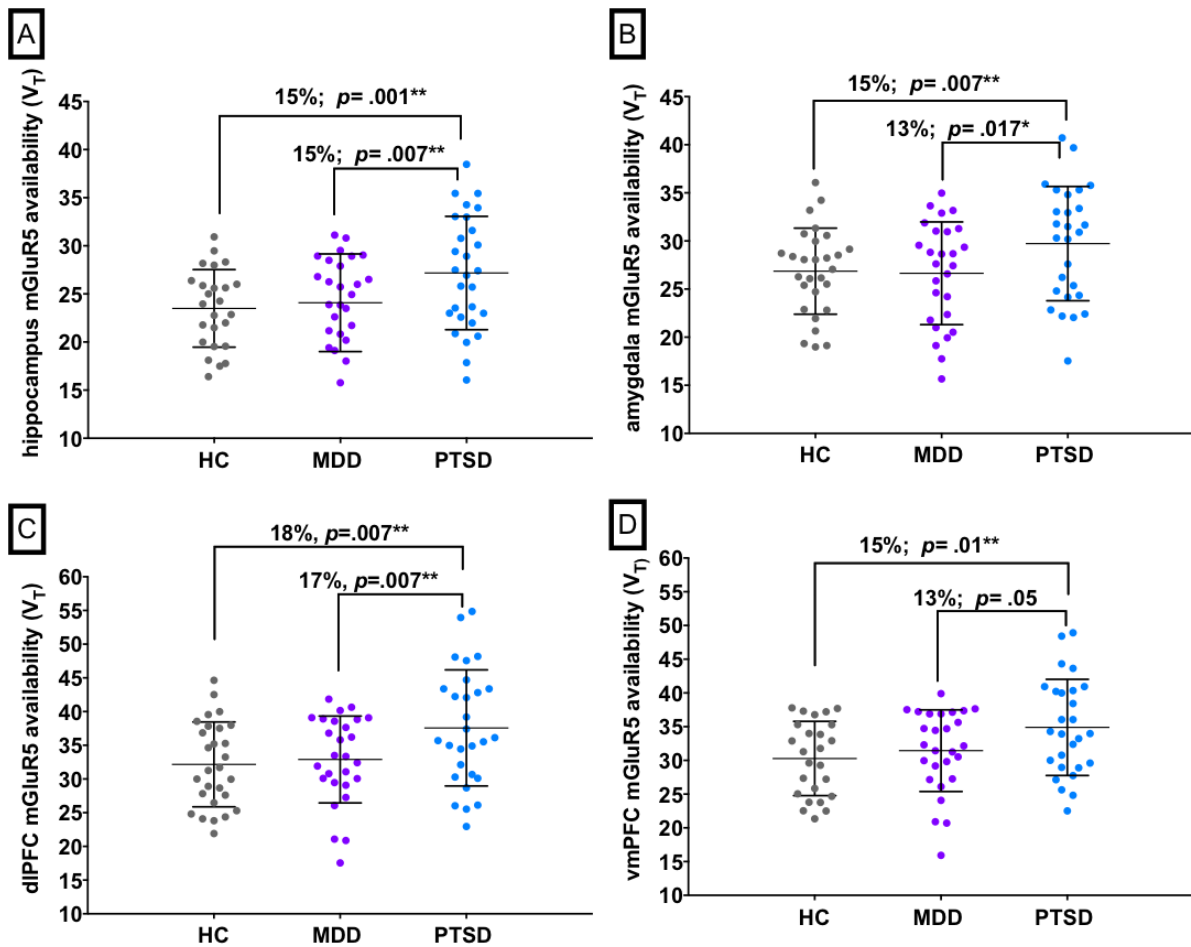

**Figure S1.** Metabotropic glutamate receptor 5 (mGluR5) compared across diagnostic groups in A. hippocampus; B. amygdala; C. dorsolateral prefrontal cortex; D. orbitofrontal cortex; E. ventromedial prefrontal cortex.  $^{**}p < .01$ ;  $^*p < .05$ , did not survive Bonferroni correction.

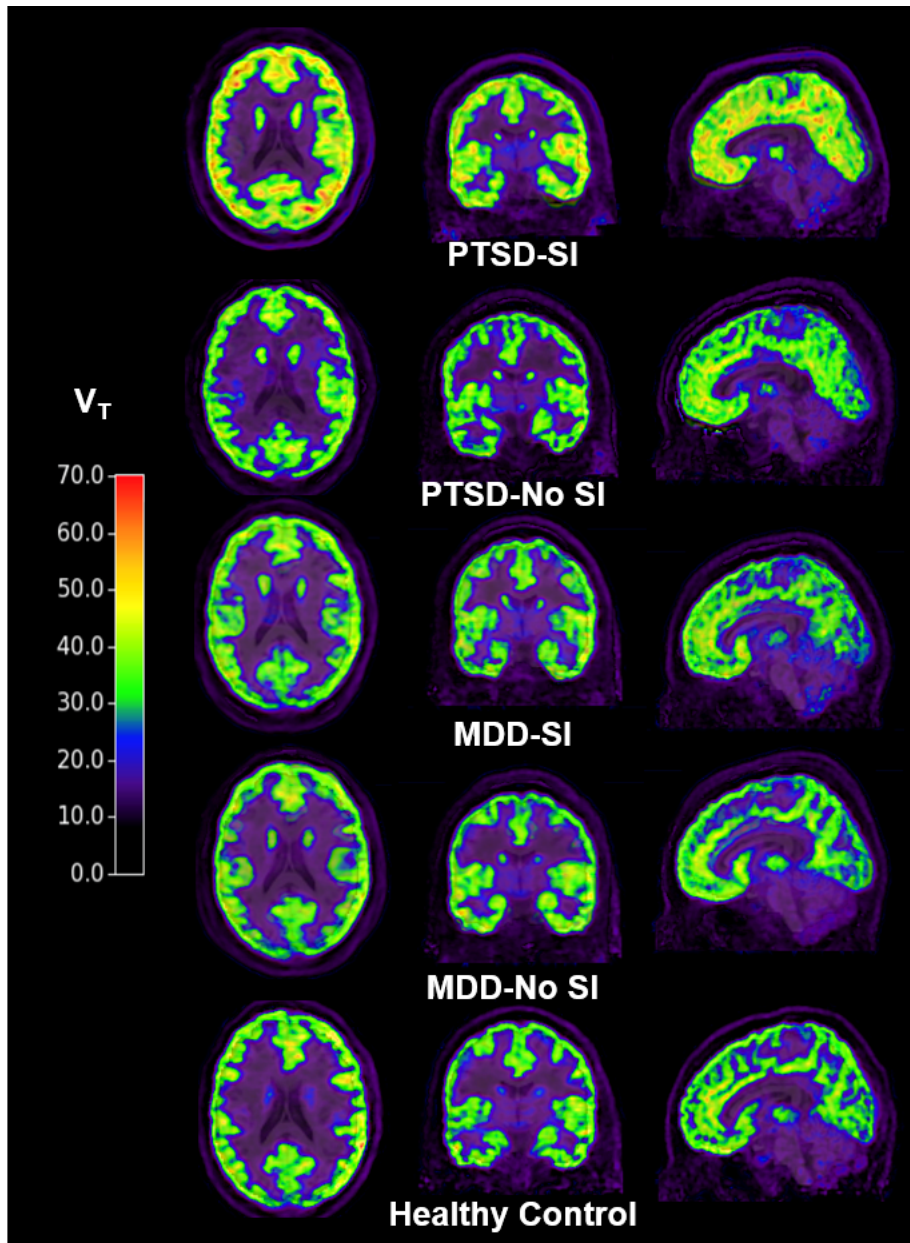

**Figure S2.** Visual representation of average parametric  $V_T$  values in individuals with posttraumatic stress disorder (PTSD) and scan-day suicidal ideation (SI), PTSD without SI, major depressive disorder (MDD) with SI, MDD without SI, and matched healthy controls.  $V_T = [^{18}\text{F}]\text{FPEB}$  volume of distribution.

Table S1. Regional [<sup>18</sup>F]FPEB V<sub>T</sub> and significance values across groups

| Region      | HCs<br>(n=29)   | MDD<br>(n=29)   | PTSD<br>(n=29)  | Cohen's d   |              | p-value     |              |
|-------------|-----------------|-----------------|-----------------|-------------|--------------|-------------|--------------|
|             |                 |                 |                 | HC/<br>PTSD | MDD/<br>PTSD | HC/<br>PTSD | MDD/<br>PTSD |
| dIPFC       | 32.16<br>(6.29) | 33.74<br>(7.75) | 38.25<br>(8.19) | 0.83        | 0.56         | <.001       | .007         |
| vmPFC       | 31.45<br>(6.78) | 32.17<br>(7.10) | 35.49<br>(8.35) | 0.53        | 0.42         | .01         | .05          |
| OFC         | 29.17<br>(5.82) | 30.62<br>(7.19) | 34.68<br>(7.12) | 0.84        | 0.56         | .001        | .007         |
| Amygdala    | 26.86<br>(4.47) | 27.23<br>(6.09) | 32.06<br>(6.08) | 0.59        | 0.47         | .007        | .017         |
| Hippocampus | 23.86<br>(4.38) | 24.62<br>(5.72) | 27.58<br>(6.19) | 0.69        | 0.50         | .001        | .007         |

dIPFC, dorsolateral prefrontal cortex; OFC, orbitofrontal cortex (OFC); vmPFC, ventromedial prefrontal cortex; ACC, anterior cingulate cortex. Error bars represent standard deviation. Mean (SD) reported.
